# Supplementary material
Source: PubMed Central journal article supplement (PMC10992926)
Supplement: 262_2021_3002_MOESM2_ESM.pdf [file 262_2021_3002_MOESM2_ESM.pdf]

## Supplemental Tables

Suppl. Table 1.

| Patient numbers       |                 |    |  |                       |                 |    |  |                       |                 |   |
|-----------------------|-----------------|----|--|-----------------------|-----------------|----|--|-----------------------|-----------------|---|
| <b>Time point B/A</b> | T cells         | 12 |  | <b>Time point C/A</b> | T cells         | 13 |  | <b>Time point D/A</b> | T cells         | 9 |
|                       | CD8             | 12 |  |                       | CD8             | 13 |  |                       | CD8             | 9 |
|                       | CD4             | 12 |  |                       | CD4             | 13 |  |                       | CD4             | 9 |
|                       | Tregs           | 12 |  |                       | Tregs           | 13 |  |                       | Tregs           | 9 |
|                       | B cells         | 12 |  |                       | B cells         | 13 |  |                       | B cells         | 9 |
|                       | NK cells        | 12 |  |                       | NK cells        | 13 |  |                       | NK cells        | 9 |
|                       | T-Zell prolifer | 12 |  |                       | T-Zell prolifer | 13 |  |                       | T-Zell prolifer | 9 |
|                       | CD8 prolifer    | 11 |  |                       | CD8 prolifer    | 13 |  |                       | CD8 prolifer    | 9 |
|                       | CD4 prolifer    | 12 |  |                       | CD4 prolifer    | 13 |  |                       | CD4 prolifer    | 9 |
|                       | Treg prolifer   | 12 |  |                       | Treg prolifer   | 13 |  |                       | Treg prolifer   | 9 |
|                       | B-Zell prolifer | 12 |  |                       | B-Zell prolifer | 13 |  |                       | B-Zell prolifer | 9 |
|                       | NK prolifer     | 12 |  |                       | NK prolifer     | 13 |  |                       | NK prolifer     | 9 |
|                       | Naive CD4       | 10 |  |                       | Naive CD4       | 11 |  |                       | Naive CD4       | 8 |
|                       | Effector CD4    | 10 |  |                       | Effector CD4    | 11 |  |                       | Effector CD4    | 8 |
|                       | Naive CD8       | 10 |  |                       | Naive CD8       | 11 |  |                       | Naive CD8       | 8 |
|                       | Effector CD8    | 10 |  |                       | Effector CD8    | 11 |  |                       | Effector CD8    | 8 |
|                       | Memory CD8      | 11 |  |                       | Memory CD8      | 11 |  |                       | Memory CD8      | 8 |

Suppl. Table 2.

Time point B/A

|                  | Age         | CTV         | Vessels     |             |             | PBM union   |             |             | V40         | V50         |
|------------------|-------------|-------------|-------------|-------------|-------------|-------------|-------------|-------------|-------------|-------------|
|                  |             |             | V10         | V20         | V30         | V10         | V20         | V30         |             |             |
| T cells          | -0,43685851 | -0,54927658 | 0,25766515  | 0,32876894  | 0,25074663  | 0,25931437  | 0,35073119  | 0,223862    | 0,14872298  | 0,14098339  |
| CD8 pos          | 0,02425803  | 0,43126091  | -0,45338241 | -0,57482781 | -0,21059821 | -0,43805271 | -0,33393627 | -0,24068222 | -0,17042493 | -0,10317518 |
| CD4 pos          | -0,0731589  | -0,45798232 | 0,26840757  | 0,28487492  | -0,11095252 | 0,22571346  | 0,11287333  | -0,02007366 | -0,12402249 | -0,1946782  |
| Tregs            | -0,15115149 | -0,1680474  | 0,25675212  | 0,45839766  | 0,4762981   | 0,47492086  | 0,56637526  | 0,48316667  | 0,48601571  | 0,44726329  |
| B cells          | -0,28753678 | -0,41634368 | 0,036403    | 0,0139421   | -0,24396726 | -0,03076374 | -0,01716306 | -0,17329708 | -0,19370599 | -0,20271397 |
| NK cells         | 0,4327795   | 0,58542058  | -0,16014038 | -0,16158712 | 0,01294459  | -0,08510035 | -0,21872459 | -0,01451875 | 0,05310102  | -0,03334413 |
| prolif T cells   | -0,42248263 | -0,15537616 | 0,35791761  | 0,44694751  | 0,48024855  | 0,39270759  | 0,52510005  | 0,44973687  | 0,38633608  | 0,30575749  |
| prolif CD8 pos   | -0,08499114 | -0,10929196 | 0,03629764  | 0,17768291  | -0,2099157  | 0,32199405  | 0,46541904  | 0,34227207  | 0,09269791  | 0,05516853  |
| prolif CD4 pos   | -0,40938601 | -0,01821935 | 0,15447004  | 0,22040421  | 0,35699271  | 0,22228415  | 0,40316046  | 0,26317545  | 0,21936265  | 0,22264558  |
| prolif Tregs     | 0,13605696  | 0,07842954  | -0,00227184 | -0,06817309 | -0,10304829 | -0,15320517 | -0,15598678 | -0,20116204 | -0,18858341 | -0,16691625 |
| prolif B cells   | -0,20925307 | 0,09207637  | 0,37656415  | 0,38058351  | 0,40531704  | 0,34283288  | 0,28240658  | 0,28168592  | 0,1609311   | 0,08228174  |
| prolif NK cells  | -0,24998002 | -0,08191232 | 0,3169939   | 0,48908654  | 0,50859987  | 0,41624919  | 0,51468685  | 0,41389747  | 0,37817451  | 0,33988465  |
| Naive CD4 pos    | 0,51446059  | 0,65762402  | -0,20537836 | -0,137959   | 0,04888799  | -0,06366192 | -0,27215205 | -0,19886118 | -0,0733067  | -0,13662031 |
| Effector CD4 pos | 0,17008233  | 0,28966007  | -0,18636516 | -0,14932925 | -0,24152792 | -0,03494961 | -0,01673438 | -0,17133951 | -0,28349143 | -0,19481035 |
| Naive CD8 pos    | 0,44762736  | 0,46745296  | 0,03403896  | 0,3621661   | 0,54455264  | 0,45371318  | 0,20666839  | 0,2191849   | 0,35260041  | 0,35486488  |
| Effector CD8 pos | 0,46076803  | 0,15039493  | -0,55330447 | -0,69401069 | -0,72891807 | -0,57263644 | -0,65711875 | -0,68664023 | -0,68936019 | -0,6638852  |
| Memory CD8 pos   | -0,61901349 | -0,1821987  | 0,44377799  | 0,50834807  | 0,60022425  | 0,38554394  | 0,53186523  | 0,48729559  | 0,49307424  | 0,51957651  |

Time point C/A

|                  | Age         | CTV         | Vessels     |             |             | PBM union   |             |             | V40         | V50         |
|------------------|-------------|-------------|-------------|-------------|-------------|-------------|-------------|-------------|-------------|-------------|
|                  |             |             | V10         | V20         | V30         | V10         | V20         | V30         |             |             |
| T cells          | 0,2613306   | -0,08177062 | -0,24190305 | 0,11383654  | 0,05302082  | 0,28582581  | 0,42860933  | 0,19163288  | 0,22436778  | 0,43879749  |
| CD8 pos          | -0,14844792 | -0,0821307  | -0,10302299 | -0,11959277 | -0,00934581 | -0,21455569 | -0,05912422 | -0,04046072 | 0,12086601  | 0,29742982  |
| CD4 pos          | -0,17820198 | -0,21209773 | 0,16475808  | 0,11982349  | -0,11781838 | 0,12265705  | 0,0001046   | -0,05258136 | -0,22140455 | -0,40358604 |
| Tregs            | 0,11285001  | -0,40159704 | -0,07422175 | 0,10813959  | 0,19087313  | 0,13420225  | 0,17238864  | 0,11739019  | 0,15609121  | 0,21692429  |
| B cells          | -0,37696723 | -0,15593805 | 0,33074923  | -0,21289573 | -0,11883879 | -0,61112404 | -0,62595935 | -0,43889799 | -0,33184316 | -0,37516074 |
| NK cells         | -0,12257783 | 0,06630362  | -0,10923247 | -0,18480717 | -0,06475021 | -0,15914164 | -0,28876879 | -0,05156845 | -0,05974944 | -0,22957323 |
| prolif T cells   | 0,29900794  | 0,07597552  | -0,04211854 | 0,01715867  | -0,08148918 | 0,16921528  | 0,16059337  | 0,07787112  | 0,03512797  | -0,0162122  |
| prolif CD8 pos   | 0,32373504  | 0,41612644  | 0,11078154  | 0,17814993  | 0,204595    | 0,3167669   | 0,24373646  | 0,23860167  | 0,21061572  | 0,0950005   |
| prolif CD4 pos   | 0,43946556  | 0,17435118  | -0,1167258  | -0,01017747 | -0,0322086  | 0,17925062  | 0,18238487  | 0,09243787  | 0,07946137  | 0,07418462  |
| prolif Tregs     | 0,55188235  | 0,16869848  | -0,21441897 | 0,00049155  | -0,02281357 | 0,20855778  | 0,27607064  | 0,16622381  | 0,21146169  | 0,3481288   |
| prolif B cells   | 0,36325639  | 0,36270589  | -0,13627623 | -0,00797255 | 0,15802281  | 0,19628522  | 0,14626713  | 0,09740709  | 0,08766672  | -0,00092052 |
| prolif NK cells  | 0,30809406  | 0,10112099  | -0,05271996 | 0,18034218  | -0,04143574 | 0,29609174  | 0,40406072  | 0,20754792  | 0,21604186  | 0,40615398  |
| Naive CD4 pos    | -0,35353535 | -0,13972767 | 0,47199931  | 0,55885443  | 0,42604355  | 0,43599194  | 0,32606558  | 0,46904224  | 0,41181548  | 0,26921796  |
| Effector CD4 pos | 0,03294606  | 0,02857346  | 0,20988627  | 0,14298501  | -0,16663201 | 0,13671133  | 0,00202575  | -0,08737682 | -0,2945957  | -0,3225229  |
| Naive CD8 pos    | 0,3695626   | -0,18157365 | -0,03660034 | 0,19215002  | 0,29473827  | 0,30536916  | 0,15053204  | 0,24062839  | 0,24646011  | 0,17437252  |
| Effector CD8 pos | -0,01014191 | 0,45341477  | -0,18935345 | -0,13809955 | -0,02847806 | 0,08575548  | 0,1248291   | -0,01985047 | -0,12120537 | -0,0383473  |
| Memory CD8 pos   | -0,21307134 | -0,34254725 | 0,35915082  | -0,01493092 | -0,05266924 | -0,34966565 | -0,42095742 | -0,21350247 | -0,13138475 | -0,32017503 |

Time point D/A

|                  | Age         | CTV         | Vessels     |             |             | PBM union   |             |             | V40         | V50         |
|------------------|-------------|-------------|-------------|-------------|-------------|-------------|-------------|-------------|-------------|-------------|
|                  |             |             | V10         | V20         | V30         | V10         | V20         | V30         |             |             |
| T cells          | -0,51505986 | -0,60320342 | -0,22972119 | -0,17602347 | 0,18286822  | -0,08941995 | 0,11489261  | 0,07399073  | 0,20426529  | 0,31918926  |
| CD8 pos          | -0,37673048 | 0,22214081  | 0,232398    | -0,09185435 | -0,28341887 | -0,42407973 | -0,34031641 | -0,22837593 | -0,15999042 | -0,16890688 |
| CD4 pos          | 0,30866078  | 0,0395459   | 0,1630374   | 0,31769689  | 0,39770374  | 0,37300347  | 0,18753777  | 0,15299714  | 0,10791153  | 0,03698517  |
| Tregs            | -0,71198355 | -0,23035178 | 0,25608695  | 0,02578691  | 0,38509381  | -0,25478162 | -0,09322154 | 0,08804298  | 0,1825975   | 0,08728861  |
| B cells          | -0,3698783  | 0,26614869  | 0,60916088  | 0,23492668  | -0,01056602 | -0,26837204 | -0,34995088 | -0,25233213 | -0,09559902 | -0,12117557 |
| NK cells         | 0,68203632  | 0,41866227  | -0,01060201 | 0,12333644  | -0,08633923 | 0,2720421   | 0,13055586  | 0,21735625  | 0,10081211  | -0,02601528 |
| prolif T cells   | 0,21745869  | 0,54650143  | 0,11454715  | 0,17763322  | -0,26576943 | 0,11130926  | 0,04900734  | 0,00209022  | -0,14495787 | -0,11082609 |
| prolif CD8 pos   | 0,25006115  | 0,33729983  | 0,140971    | 0,33359832  | -0,0138323  | 0,29533761  | 0,17781655  | 0,13110994  | 0,0017187   | 0,04472281  |
| prolif CD4 pos   | 0,13273902  | 0,40147785  | -0,09518848 | -0,01409174 | -0,3424188  | 0,08450749  | 0,16164879  | 0,15340281  | 0,01715991  | 0,05041127  |
| prolif Tregs     | 0,26926073  | 0,28245306  | -0,0603397  | 0,08936716  | -0,24063554 | 0,40743341  | 0,41830871  | 0,37807086  | 0,18113805  | 0,18243583  |
| prolif B cells   | 0,41678779  | 0,06636008  | -0,24983914 | 0,10843968  | 0,06247519  | 0,51023441  | 0,51160623  | 0,49009263  | 0,27981775  | 0,25341734  |
| prolif NK cells  | -0,12838682 | 0,20857535  | -0,20981122 | -0,02996999 | -0,13035063 | 0,15237182  | 0,36624717  | 0,30330451  | 0,24497944  | 0,34368374  |
| Naive CD4 pos    | 0,63701261  | 0,66330353  | -0,0858266  | 0,18238409  | 0,00841936  | -0,16378737 | -0,27269904 | -0,27034124 | -0,18980513 | -0,12478047 |
| Effector CD4 pos | 0,29978901  | 0,22831528  | 0,09985133  | 0,06392049  | -0,30211497 | 0,2163181   | 0,15936765  | 0,21347698  | 0,16289537  | 0,13579293  |
| Naive CD8 pos    | -0,07198493 | 0,02089217  | -0,18498078 | -0,2100735  | -0,03858392 | -0,57444512 | -0,55436406 | -0,55740863 | -0,47137981 | -0,41468676 |
| Effector CD8 pos | 0,66600819  | 0,45806866  | -0,40147429 | -0,20531159 | -0,42417593 | -0,22492303 | -0,23497639 | -0,23165844 | -0,31790882 | -0,27784501 |
| Memory CD8 pos   | -0,74884005 | -0,72499459 | 0,15826628  | -0,00159683 | 0,26303077  | 0,19566641  | 0,28319086  | 0,23940813  | 0,25879747  | 0,26099906  |
